# Supplementary material for: Predicting the Postmortem Interval Based on Gravesoil Microbiome Data and a Random Forest Model
Source: MDPI journal article supplement (doi:10.3390/microorganisms11010056), 2022-12-24
Supplement: s1 [file s1]

## Supplementary Materials

Table S1. PERMANOVA (pairwise comparison) showing Bray–Curtis distance based on dissimilarity of bacterial communities among the soil samples.

| Group       | Sums of squares | Mean squares | F.Model  | Variation (R <sup>2</sup> ) | Pr (>F) | Sig |
|-------------|-----------------|--------------|----------|-----------------------------|---------|-----|
| day0/day12  | 0.214474        | 0.214474     | 4.561615 | 0.363139                    | 0.01    | **  |
| day0/day15  | 0.175077        | 0.175077     | 3.785882 | 0.321222                    | 0.005   | **  |
| day0/day18  | 0.188699        | 0.188699     | 4.418015 | 0.355775                    | 0.007   | **  |
| day0/day21  | 0.328569        | 0.328569     | 5.171729 | 0.392639                    | 0.004   | **  |
| day0/day24  | 0.268445        | 0.268445     | 4.474556 | 0.358695                    | 0.009   | **  |
| day0/day27  | 0.906031        | 0.906031     | 8.759627 | 0.555827                    | 0.01    | **  |
| day0/day30  | 0.754885        | 0.754885     | 8.039824 | 0.534569                    | 0.003   | **  |
| day0/day33  | 1.258156        | 1.258156     | 11.06872 | 0.580465                    | 0.008   | **  |
| day0/day36  | 1.439606        | 1.439606     | 21.50584 | 0.728867                    | 0.011   | *   |
| day0/day3   | 0.160911        | 0.160911     | 4.222072 | 0.376229                    | 0.015   | *   |
| day0/day6   | 0.145084        | 0.145084     | 2.893431 | 0.265612                    | 0.015   | *   |
| day0/day9   | 0.178325        | 0.178325     | 2.855211 | 0.263027                    | 0.007   | **  |
| day12/day15 | 0.065793        | 0.065793     | 1.30021  | 0.139804                    | 0.135   | NS  |
| day12/day18 | 0.055971        | 0.055971     | 1.189143 | 0.129407                    | 0.303   | NS  |
| day12/day21 | 0.153654        | 0.153654     | 2.263316 | 0.220525                    | 0.013   | *   |
| day12/day24 | 0.168886        | 0.168886     | 2.62447  | 0.247021                    | 0.007   | **  |
| day12/day27 | 0.736498        | 0.736498     | 6.793502 | 0.492515                    | 0.008   | **  |
| day12/day30 | 0.473293        | 0.473293     | 4.786897 | 0.40612                     | 0.018   | *   |
| day12/day33 | 0.96866         | 0.96866      | 8.207262 | 0.506394                    | 0.008   | **  |
| day12/day36 | 1.163426        | 1.163426     | 16.31796 | 0.671025                    | 0.009   | **  |
| day12/day3  | 0.100227        | 0.100227     | 2.325907 | 0.249403                    | 0.028   | *   |
| day12/day6  | 0.075075        | 0.075075     | 1.377527 | 0.146897                    | 0.071   | NS  |
| day12/day9  | 0.049924        | 0.049924     | 0.747213 | 0.085423                    | 0.763   | NS  |
| day15/day18 | 0.051471        | 0.051471     | 1.111786 | 0.122016                    | 0.314   | NS  |
| day15/day21 | 0.185826        | 0.185826     | 2.768707 | 0.257107                    | 0.016   | *   |
| day15/day24 | 0.140361        | 0.140361     | 2.207684 | 0.216277                    | 0.011   | *   |
| day15/day27 | 0.748866        | 0.748866     | 6.964283 | 0.498721                    | 0.01    | **  |
| day15/day30 | 0.500599        | 0.500599     | 5.108672 | 0.421902                    | 0.01    | **  |
| day15/day33 | 0.984773        | 0.984773     | 8.39874  | 0.512158                    | 0.011   | *   |
| day15/day36 | 1.182285        | 1.182285     | 16.76406 | 0.676951                    | 0.011   | *   |
| day15/day3  | 0.101727        | 0.101727     | 2.41008  | 0.256117                    | 0.03    | *   |
| day15/day6  | 0.068303        | 0.068303     | 1.271291 | 0.137121                    | 0.268   | NS  |
| day15/day9  | 0.055623        | 0.055623     | 0.842256 | 0.095254                    | 0.557   | NS  |
| day18/day21 | 0.102358        | 0.102358     | 1.609837 | 0.16752                     | 0.102   | NS  |
| day18/day24 | 0.098057        | 0.098057     | 1.633063 | 0.169527                    | 0.018   | *   |
| day18/day27 | 0.653046        | 0.653046     | 6.310151 | 0.474086                    | 0.004   | **  |
| day18/day30 | 0.418974        | 0.418974     | 4.459451 | 0.38915                     | 0.02    | *   |

|             |          |          |          |          |       |    |
|-------------|----------|----------|----------|----------|-------|----|
| day18/day33 | 0.877393 | 0.877393 | 7.715449 | 0.490947 | 0.013 | *  |
| day18/day36 | 1.05722  | 1.05722  | 15.7814  | 0.663603 | 0.011 | *  |
| day18/day3  | 0.107106 | 0.107106 | 2.805991 | 0.286151 | 0.016 | *  |
| day18/day6  | 0.07496  | 0.07496  | 1.493408 | 0.15731  | 0.04  | *  |
| day18/day9  | 0.080836 | 0.080836 | 1.29323  | 0.139158 | 0.171 | NS |
| day21/day24 | 0.076562 | 0.076562 | 0.946781 | 0.105824 | 0.442 | NS |
| day21/day27 | 0.384376 | 0.384376 | 3.019775 | 0.301382 | 0.056 | NS |
| day21/day30 | 0.253983 | 0.253983 | 2.157031 | 0.23556  | 0.09  | NS |
| day21/day33 | 0.560474 | 0.560474 | 4.165868 | 0.342423 | 0.006 | ** |
| day21/day36 | 0.69587  | 0.69587  | 7.924543 | 0.497631 | 0.009 | ** |
| day21/day3  | 0.216463 | 0.216463 | 3.493288 | 0.332907 | 0.011 | *  |
| day21/day6  | 0.208458 | 0.208458 | 2.935427 | 0.268433 | 0.008 | ** |
| day21/day9  | 0.211916 | 0.211916 | 2.543159 | 0.241214 | 0.011 | *  |
| day24/day27 | 0.481099 | 0.481099 | 3.903683 | 0.358015 | 0.032 | *  |
| day24/day30 | 0.3121   | 0.3121   | 2.744868 | 0.281673 | 0.036 | *  |
| day24/day33 | 0.687009 | 0.687009 | 5.244292 | 0.395966 | 0.005 | ** |
| day24/day36 | 0.825464 | 0.825464 | 9.795027 | 0.550436 | 0.009 | ** |
| day24/day3  | 0.226433 | 0.226433 | 3.909292 | 0.358345 | 0.015 | *  |
| day24/day6  | 0.204436 | 0.204436 | 3.029752 | 0.274689 | 0.009 | ** |
| day24/day9  | 0.202887 | 0.202887 | 2.542778 | 0.241187 | 0.007 | ** |
| day27/day30 | 0.156429 | 0.156429 | 0.902474 | 0.130746 | 0.538 | NS |
| day27/day33 | 0.165888 | 0.165888 | 0.898711 | 0.113779 | 0.542 | NS |
| day27/day36 | 0.122934 | 0.122934 | 0.93713  | 0.118069 | 0.505 | NS |
| day27/day3  | 0.829036 | 0.829036 | 7.658151 | 0.560702 | 0.03  | *  |
| day27/day6  | 0.810564 | 0.810564 | 7.23819  | 0.508364 | 0.012 | *  |
| day27/day9  | 0.728118 | 0.728118 | 5.776114 | 0.452103 | 0.007 | ** |
| day30/day33 | 0.155261 | 0.155261 | 0.886978 | 0.112461 | 0.626 | NS |
| day30/day36 | 0.193326 | 0.193326 | 1.589299 | 0.185032 | 0.163 | NS |
| day30/day3  | 0.589751 | 0.589751 | 6.072017 | 0.502983 | 0.026 | *  |
| day30/day6  | 0.582238 | 0.582238 | 5.683423 | 0.448099 | 0.008 | ** |
| day30/day9  | 0.506667 | 0.506667 | 4.348425 | 0.383174 | 0.015 | *  |
| day33/day36 | 0.158147 | 0.158147 | 1.146429 | 0.125342 | 0.326 | NS |
| day33/day3  | 1.070197 | 1.070197 | 8.973375 | 0.561771 | 0.012 | *  |
| day33/day6  | 1.076619 | 1.076619 | 8.88663  | 0.526252 | 0.007 | ** |
| day33/day9  | 0.964953 | 0.964953 | 7.230077 | 0.474724 | 0.011 | *  |
| day36/day3  | 1.246937 | 1.246937 | 18.93293 | 0.730073 | 0.01  | ** |
| day36/day6  | 1.273708 | 1.273708 | 17.11446 | 0.681458 | 0.007 | ** |
| day36/day9  | 1.15907  | 1.15907  | 13.36315 | 0.625523 | 0.009 | ** |
| day3/day6   | 0.056835 | 0.056835 | 1.21797  | 0.148208 | 0.231 | NS |
| day3/day9   | 0.105025 | 0.105025 | 1.72921  | 0.198095 | 0.093 | NS |
| day6/day9   | 0.060494 | 0.060494 | 0.864957 | 0.09757  | 0.629 | NS |

\*,  $p < 0.05$ ; \*\*,  $p < 0.01$ ; NS,  $p > 0.05$

Table S2. Statistical analysis of correlation coefficients between the relative abundances of bacterial communities at the phylum level and environmental factors.

|                       | Temperature | Humidity | pH      | NH <sub>4</sub> <sup>+</sup> -N | NO <sub>3</sub> <sup>-</sup> -N | TOC   | TN      |
|-----------------------|-------------|----------|---------|---------------------------------|---------------------------------|-------|---------|
| <b>Acidobacteria</b>  | -0.59**     | -0.16    | -0.38** | -0.63**                         | 0.32*                           | -0.09 | -0.30*  |
| <b>Actinobacteria</b> | -0.74**     | -0.18    | -0.49** | -0.70**                         | 0.42**                          | -0.06 | -0.34** |
| <b>Bacteroidetes</b>  | 0.50**      | 0.09     | 0.47**  | 0.48**                          | -0.21                           | 0.21  | 0.47**  |
| <b>Chloroflexi</b>    | -0.71**     | -0.13    | -0.48** | -0.68**                         | 0.27*                           | -0.17 | -0.40** |
| <b>Firmicutes</b>     | 0.41**      | 0.21     | 0.45**  | 0.73**                          | -0.31*                          | 0.01  | 0.31*   |
| <b>Proteobacteria</b> | 0.68**      | 0.22     | 0.43**  | 0.67**                          | -0.38**                         | 0.04  | 0.26*   |

\*,  $p < 0.05$ ; \*\*,  $p < 0.01$

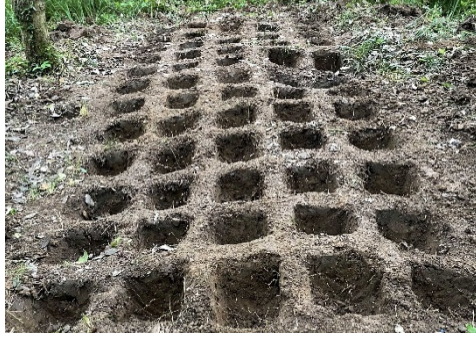

Figure S1. The experimental site in this study. The site is in a small geographic area, where is about 4 m long and 1.5 m width.

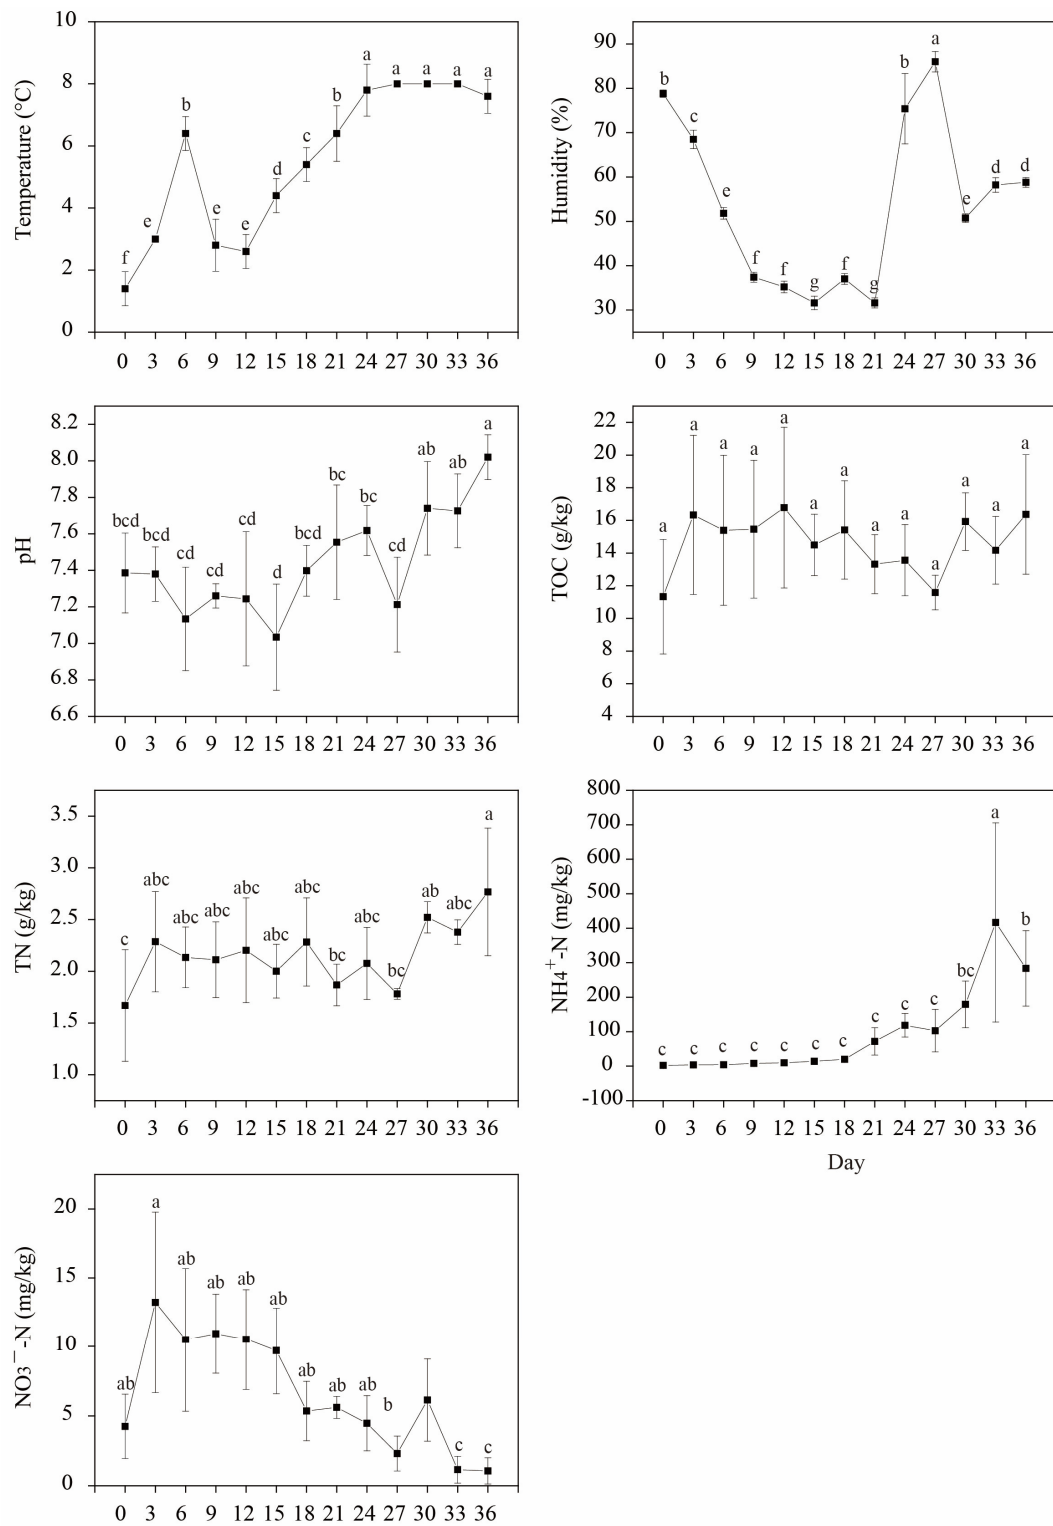

Figure S2. The changes in environmental factors in gravesoils during cadaver decomposition.
